# Supplementary material for: Integrated Secondary Metabolomic and Antioxidant Ability Analysis Reveals the Accumulation Patterns of Metabolites in Momordica charantia L. of Different Cultivars
Source: MDPI journal article supplement (doi:10.3390/ijms241914495), 2023-09-24
Supplement: s1 [file s1]

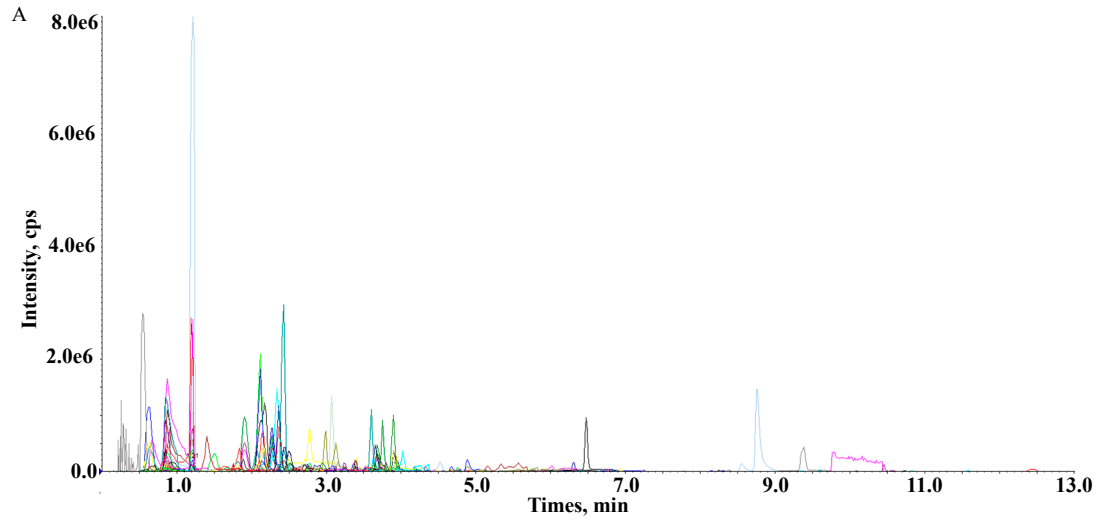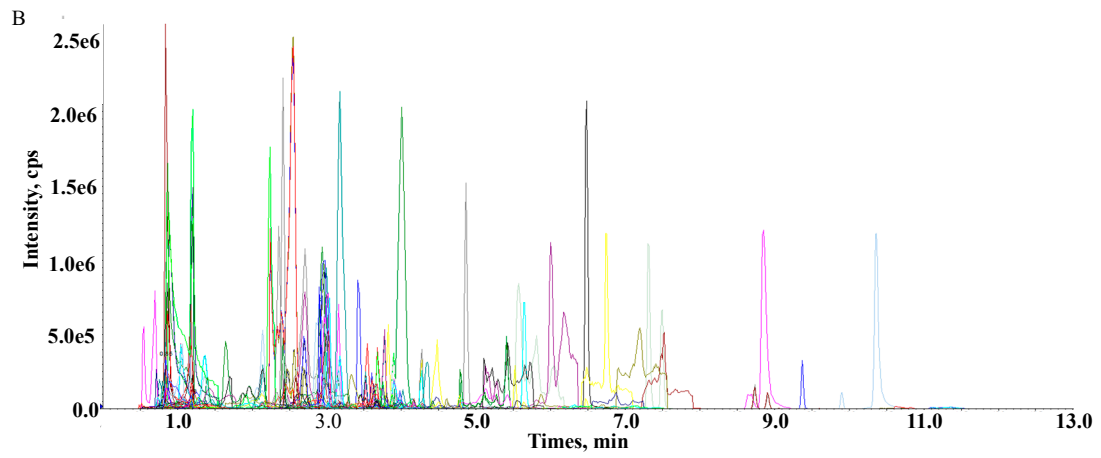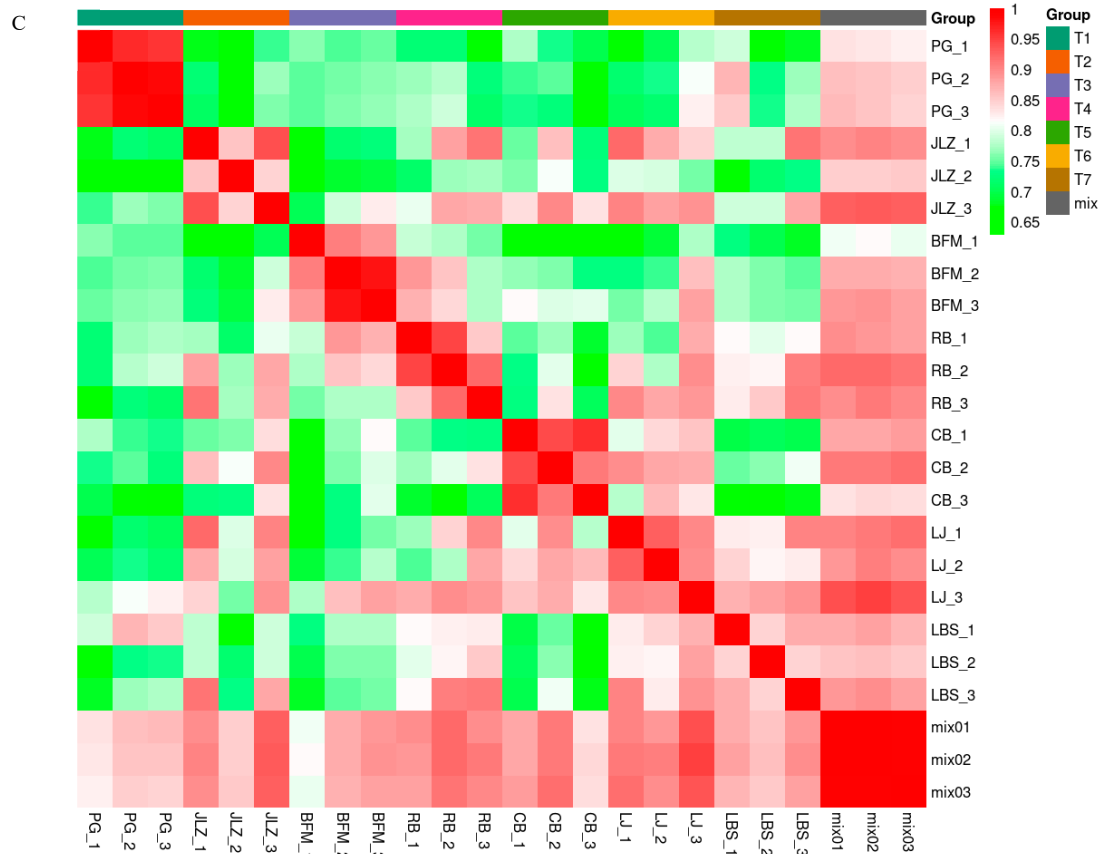

**Figure S1.** Overview of the metabolomics analysis. (A, B) The total ion current (TIC) of the QC samples in positive ion mode and negative ion mode. (C) Pearson's correlation coefficient analysis of PG, JLZ, BFM, RB, CB, LJ, LBS and Mix quality control sample.
